# Supplementary material
Source: PubMed Central journal article supplement (PMC3191571)

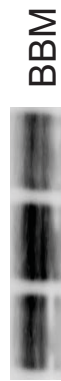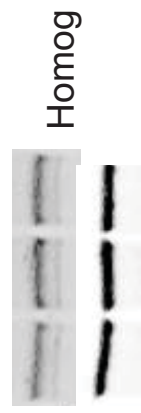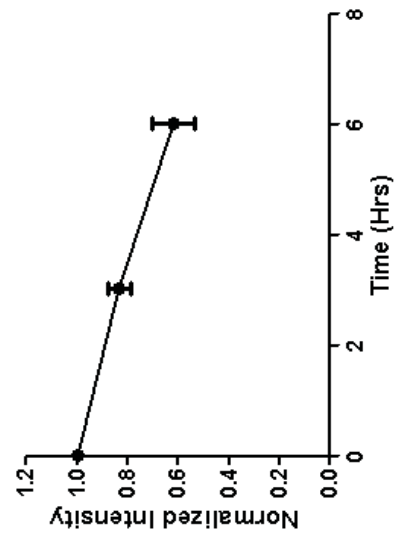

Supplement: supp_00412.2010_figureS1.pdf [file supp_00412.2010_figureS1.pdf]
